# Supplementary material for: mTOR regulates aerobic glycolysis through NEAT1 and nuclear paraspeckle-mediated mechanism in hepatocellular carcinoma
Source: Theranostics. 2022 Apr 24;12(7):3518–33. doi: 10.7150/thno.72581 (PMC9065186; doi:10.7150/thno.72581)
Supplement: Supplementary file 1 — Supplementary figures and tables. [file thnov12p3518s1.pdf]

## **Supplementary Information**

### **mTOR regulates aerobic glycolysis through NEAT1 and nuclear paraspeckle-mediated mechanism in hepatocellular carcinoma**

Hong Zhang, Xiaoyang Su, Stephen K. Burley and X.F. Steven Zheng\*

\*Corresponding author. Email: zhengst@cinj.rutgers.edu.

#### **Table of Contents**

Figure S1-S11 with figure legends

Tables S1-S6

Supplementary Materials and Methods

## SUPPLEMENTARY FIGURES

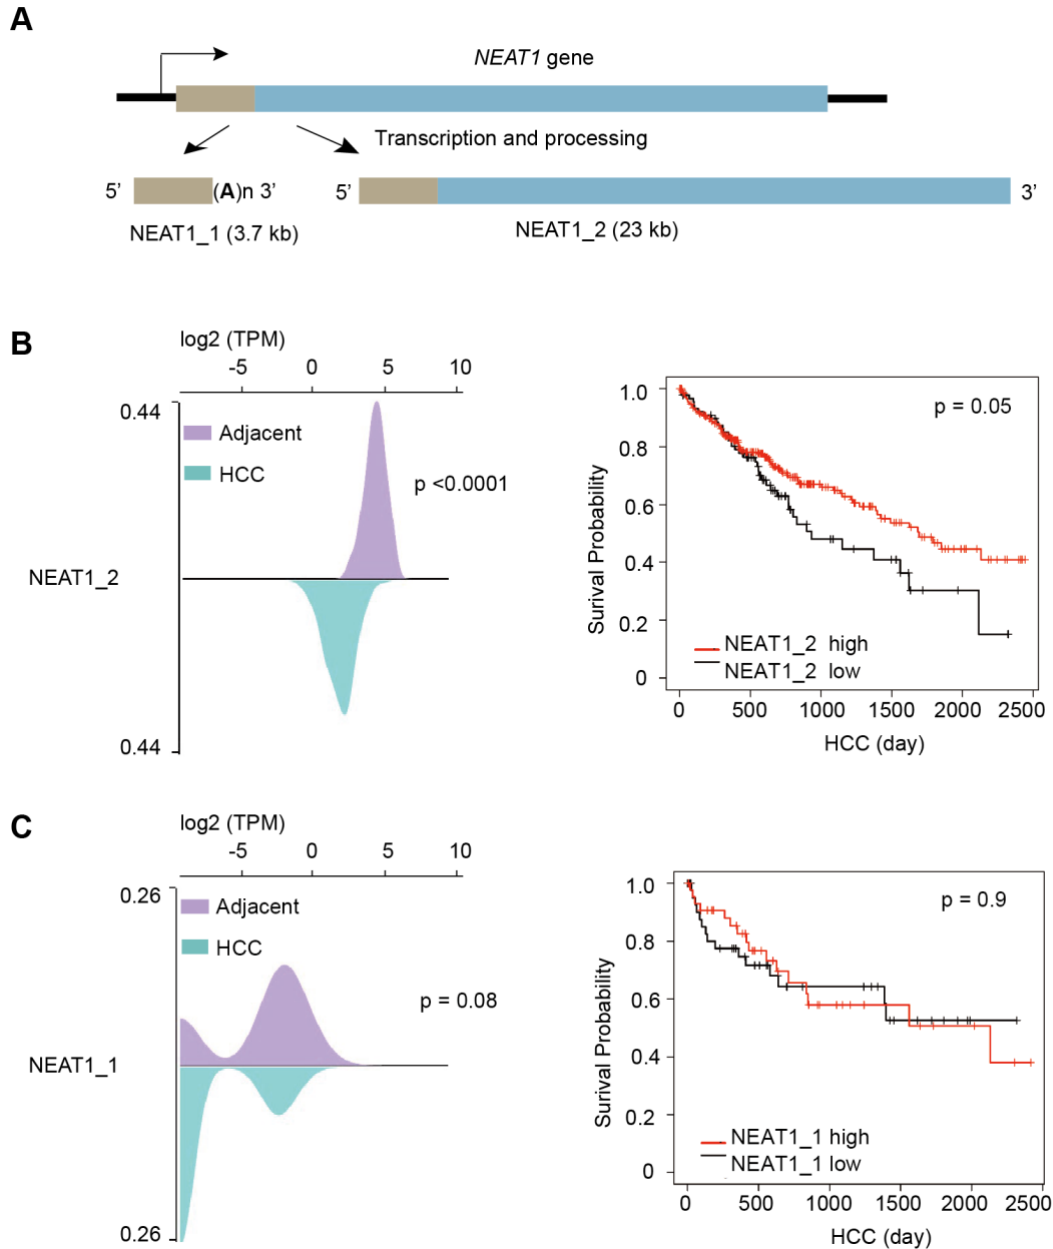

**Figure S1. NEAT1\_2 may function dominantly during HCC progression.**

(A) The human *NEAT1* encodes two completely overlapping NEAT1 isoforms, NEAT1\_1 and NEAT1\_2. NEAT1\_1 is polyadenylated while NEAT1\_2 is not. (B, C) The expression and density of NEAT1\_2 (B) and NEAT1\_1 (C) transcripts were analyzed in 369 primary HCC and 160 normal liver tissues. The sample information and mRNA expression data of NEAT1\_2 and NEAT1\_1 transcript was analyzed and downloaded from UCSC Xena portal (<https://xenabrowser.net/>). p value was determined by unpaired two-

tailed Student's t test (Left panel). HCC patients with low NEAT1 expression have poor overall survival. (Right panel) Kaplan-Meier analysis was used to compare overall survival of HCC patients with high and low NEAT1\_2 (**B**) or NEAT1\_1 (**C**) expression. p value was calculated using the two-sided log-rank test.

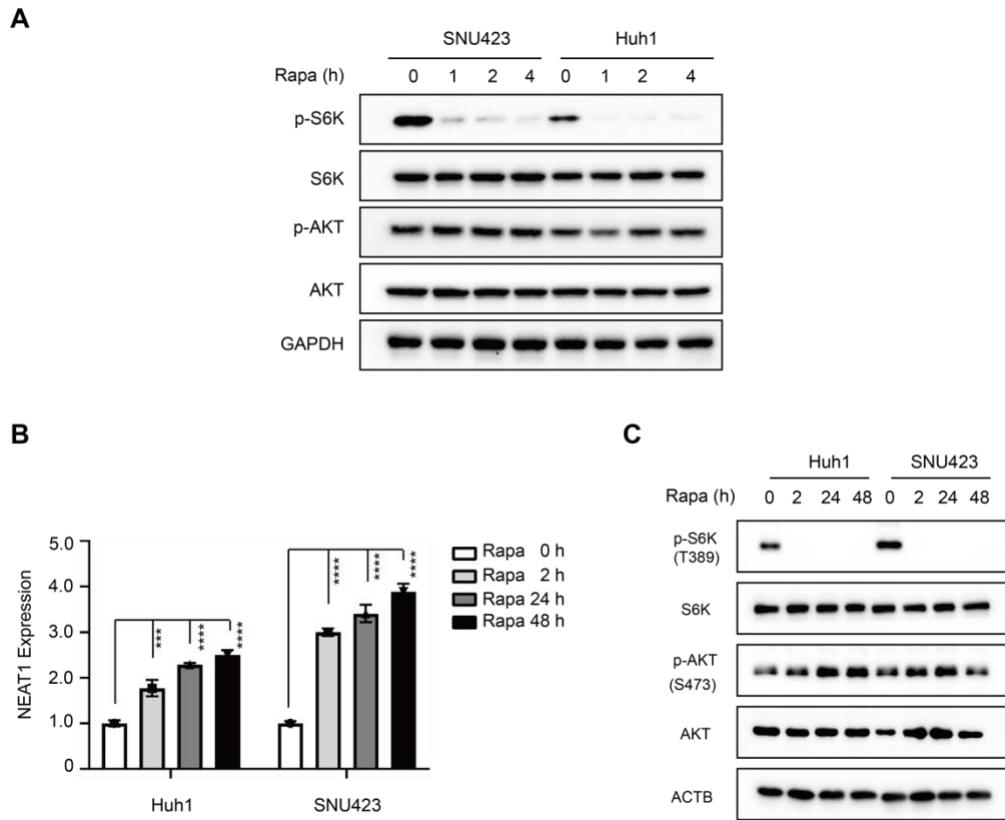

**Figure S2. Acute and chronic rapamycin treatment inhibits mTORC1 signaling and induces NEAT1 expression in HCC cells.**

(A) SNU423 and Huh1 cells were treated with 100 nM rapamycin for 0, 1, 2 and 4 h. Rapamycin effect on mTORC1 and mTORC2 signaling was determined by immunoblot of p-S6K(T389) and p-AKT(S473), respectively. GAPDH was used as a loading control. (B, C) SNU423 and Huh1 cells were treated with 100 nM rapamycin for 0, 2, 24 and 48 h. NEAT1 expression was analyzed by qRT-PCR and values are normalized against ACTIN (B). Data are shown as mean  $\pm$  SEM ( $n = 3$ ); Statistical significance was tested using one-way ANOVA followed by Tukey's multiple comparisons test. \*\*\*\*  $p < 0.0001$ . The effect of rapamycin on mTORC1 and mTORC2 signaling was determined by immunoblot of p-S6K(T389) and p-AKT(S473), respectively. ACTB was used as a loading control (C).

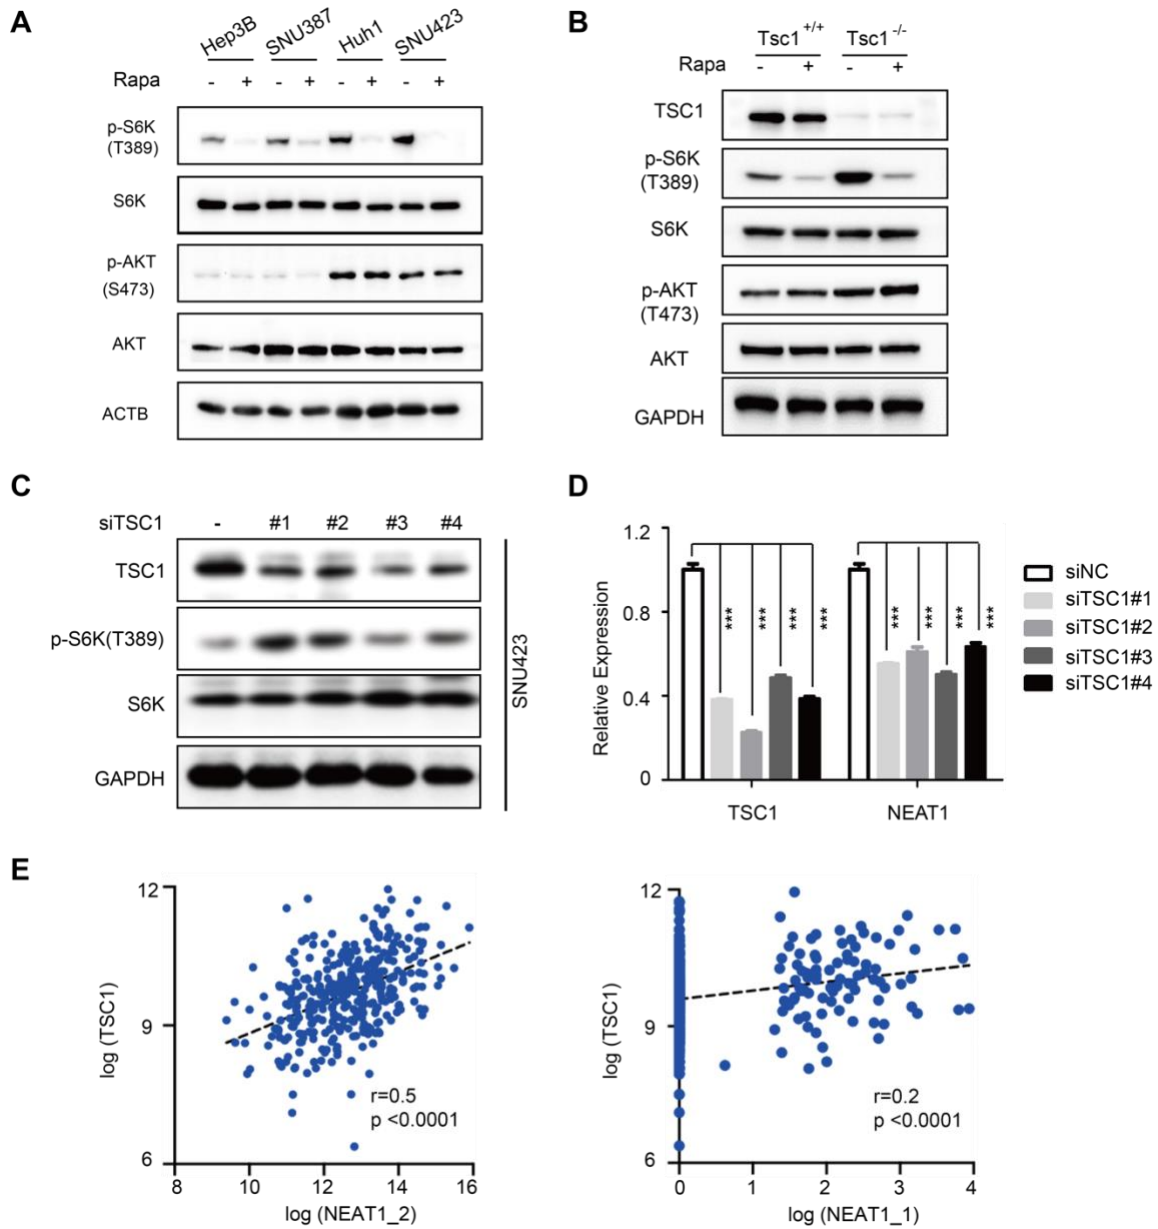

**Figure S3. Activation of mTORC1 signaling by TSC1 down-regulation suppresses NEAT1 expression.**

(A) Effect of rapamycin on mTOR signaling in different HCC cell lines. Hep3B, SNU387, Huh1 and SNU423 cells were treated without or with 100 nM rapamycin. mTOR signaling was determined by immunoblot of p-S6K(T389), S6K, p-AKT(S473) and AKT, respectively. ACTB was used as a loading control. (B) Effect of rapamycin on mTOR signaling in MEF-wild type and MEF-*Tsc1*<sup>-/-</sup> cells. WT and mutant MEF cells were treated without or with 100 nM rapamycin for 2 h and analyzed for mTOR signaling

by immunoblot. (C) SNU423 cells were transfected with 4 independent TSC1 siRNAs and measured for mTORC1 activation by pS6K1. GAPDH was used as a loading control. (D) NEAT1 expression in control and TSC1 knockdown cells was measured by qRT-PCR. Relative NEAT1 expression was calculated relative to Actin. Data represent mean  $\pm$  SEM (n = 3). p value was determined by one-way ANOVA followed by Tukey's multiple comparisons test. \*\*\* p < 0.001. (E) NEAT1\_2 expression is negatively correlated with mTORC1 signaling in human HCC tumors. Correlation analysis of TSC1 mRNA expression with NEAT1\_2 RNA (left panel) or NEAT1\_1 RNA (right panel) in 369 primary human HCC tumors. p value was analyzed by nonparametric Spearman correlation test.

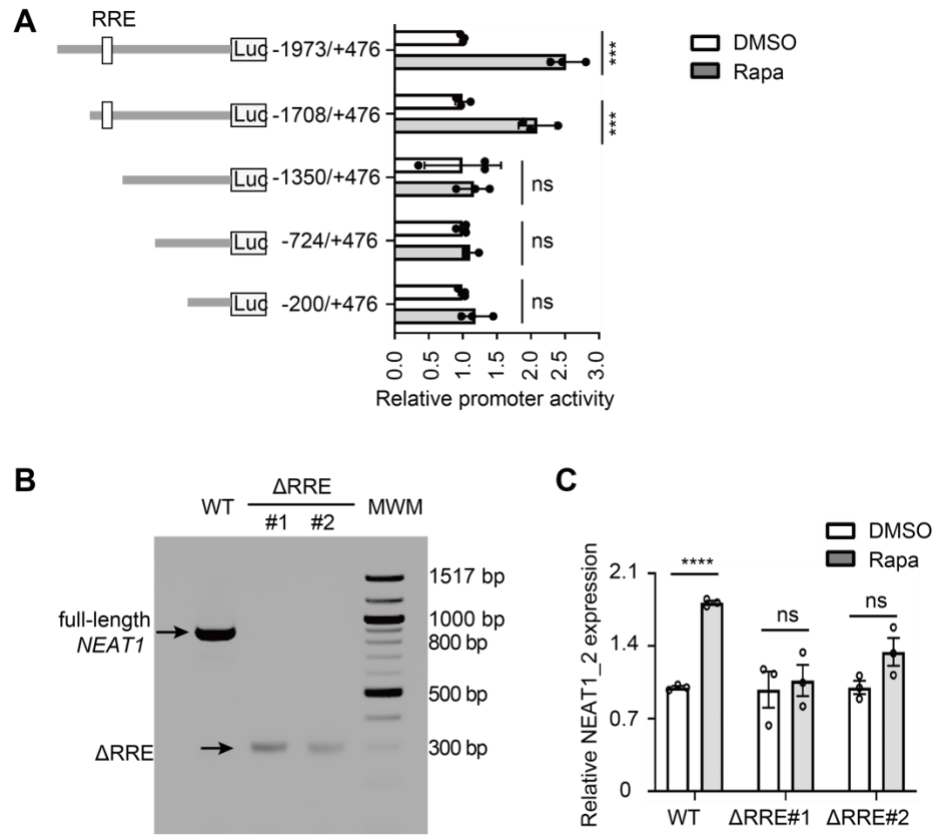

**Figure S4. mTORC1 acts at NEAT1 promoter and negatively regulates NEAT1 transcription.**

(A) Sequential deletion analysis of NEAT1 promoter as assayed by luciferase reporter in SNU423 cells in the absence or presence of 100 nM rapamycin. Results were normalized to the DMSO control within each group. Mean  $\pm$  SEM (n = 3), unpaired two-tail t test; \*\*\* p < 0.001. (B) PCR analysis of the Rapamycin Response Region (RRE) genomic DNA region in wild type and RRE $\Delta$  SNU423 cells. MWM, DNA molecular weight marker. (C) CRISPR/cas9-mediated deletion of RRE in SNU423 cells blunts rapamycin induction of NEAT1 expression. WT and two independent clones of RRE genomic deletion SNU423 cells were treated with 100 nM rapamycin or drug vehicle (DMSO) for 2 h. NEAT1 expression was analyzed by RT-qPCR. Results were normalized to NEAT1 expression of normal condition within each cell type. Mean  $\pm$  SEM (n = 3), unpaired two-tail t test; \*\*\*\* p < 0.0001. ns, not significant.

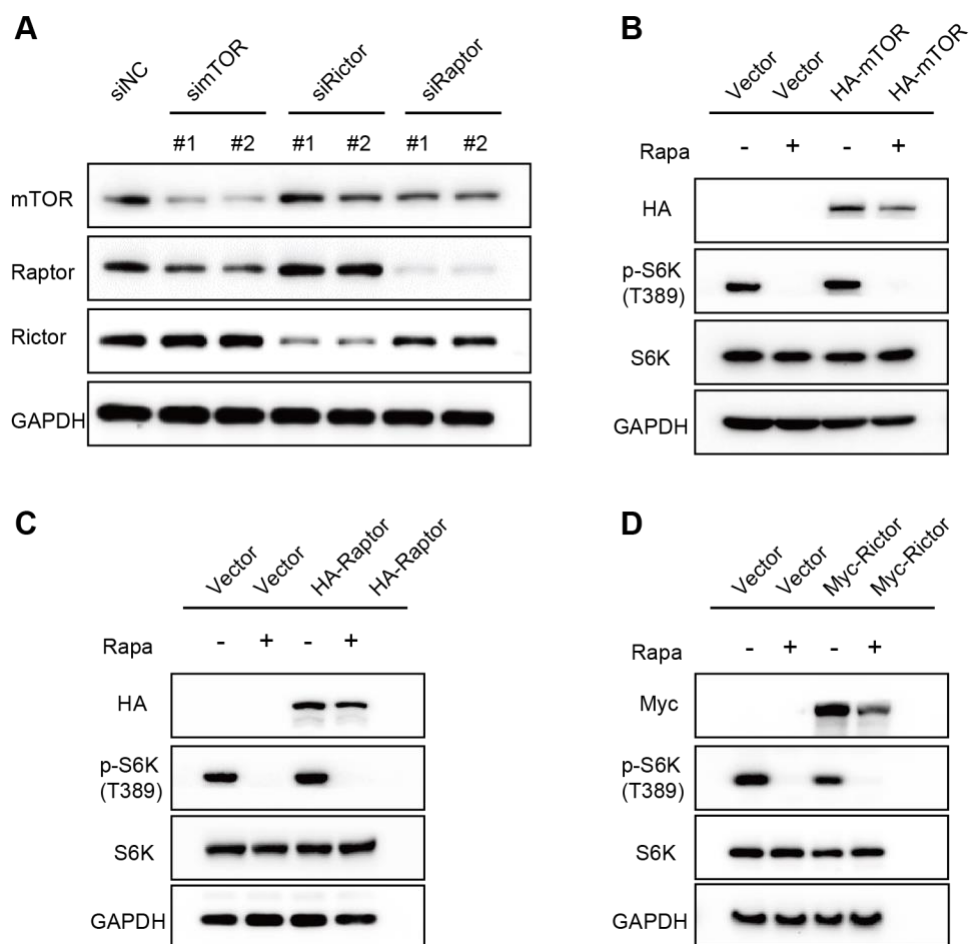

**Figure S5. Expression of si-mTOR, HA-mTOR, HA-Raptor and Myc-Rictor in HCC cells for ChIP assays.** (A) SNU423 cells were transfected with 2 independent mTOR siRNAs and measured for mTOR protein expression. GAPDH was used as a loading control. (B-D) SNU423 cells transiently expressing HA-mTOR(B), HA-Raptor (C) and Myc-Rictor (D) were treated with or without 100 nM Rapamycin for 2 h and cells were analyzed for expression of tagged proteins, and mTORC1 signaling by immunoblot of p-S6K and S6K. GAPDH was used as a loading control.

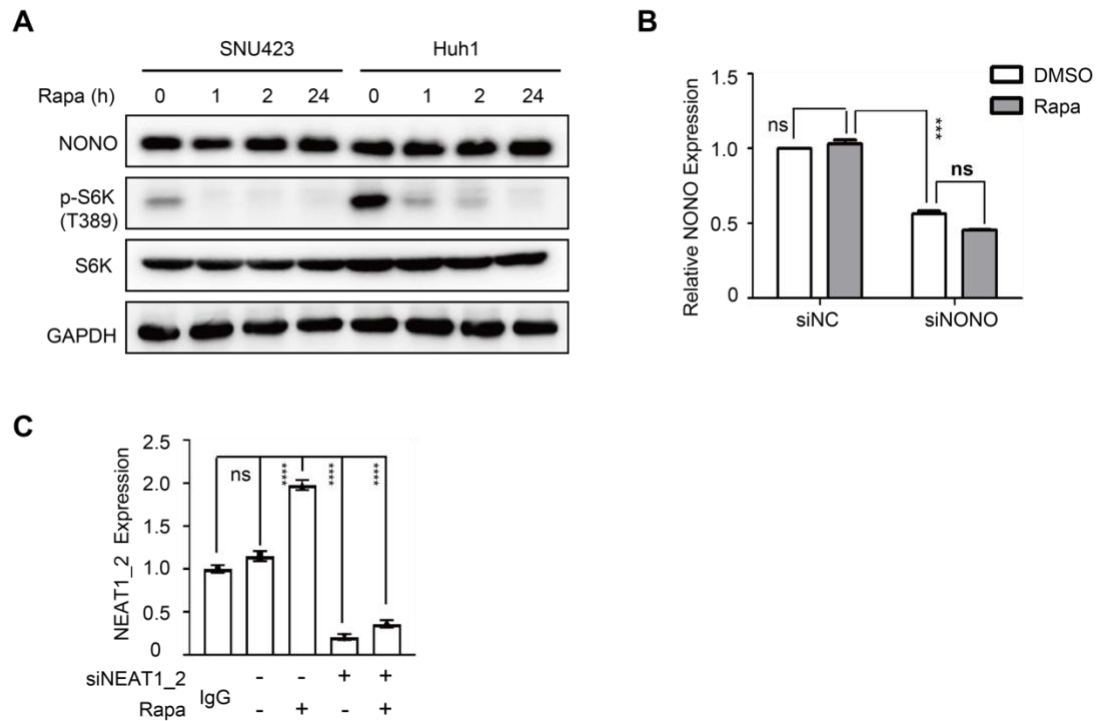

**Figure S6. Rapamycin does not affect NONO protein and mRNA expression in HCC cells. (A)**

Rapamycin does not affect NONO protein expression in HCC cells. SNU423 and Huh1 cells were treated with 100 nM rapamycin for different times and measured for the level of NONO protein, p-S6K and S6K by immunoblot. GAPDH was used as a loading control. **(B)** Rapamycin does not affect NONO mRNA expression in HCC cells. SNU423 cells were transfected with control siRNA (siNC) or NONO siRNA (siNONO), and treated with 100 nM rapamycin for 24 h. NONO mRNA expressed was measured by qRT-PCR. Relative NONO expression was calculated relative to ACTIN. Data represent mean  $\pm$  SEM (n = 3). p value was determined by one-way ANOVA followed by Tukey's multiple comparisons test. \*\*\* p < 0.001. ns, not significant. **(C)** Rapamycin significantly induces NEAT1\_2 expression in HCC cells. SNU423 cells were transfected with control siRNA (siNC) or NEAT1\_2 siRNA (siNEAT1\_2), and treated with 100 nM rapamycin for 24 h. NEAT1\_2 expression was measured by qRT-PCR and calculated relative to ACTIN. Data represent mean  $\pm$  SEM (n = 3). p value was determined by one-way ANOVA followed by Tukey's multiple comparisons test. \*\*\*\* p < 0.0001. ns, not significant.

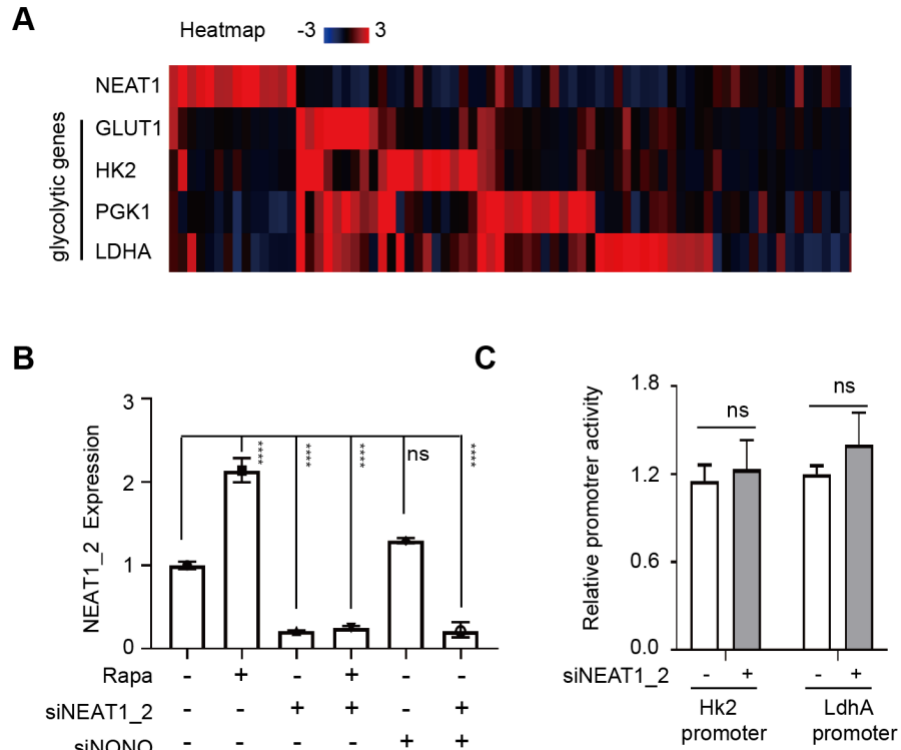

**Figure S7. mTORC1-NEAT1-NONO axis regulates mRNA splicing and expression of key aerobic glycolytic enzymes.** (A) NEAT1 expression is negatively correlated with glycolytic genes in human primary HCC tumors. Heatmap shows high NEAT1 expression is mutually exclusive from high expression of glycolytic genes GLUT1, HK2, PGK1 and LDHA in human primary HCC tumors from TCGA hepatocellular carcinoma (LIHC) transcriptome dataset. (B) NEAT1\_2 expression under different conditions. SNU423 cells were treated with 100 nM rapamycin for 16 h in the presence or absence of NEAT1 and/or NONO knockdown. NEAT1\_2 expression was analyzed by qRT-PCR and normalized against ACTIN. Data are shown as mean  $\pm$  SEM (n = 3). p value was determined by one-way ANOVA followed by Tukey's multiple comparisons test. \*\*\*\* p < 0.0001. (C) NEAT1\_2 does not regulate transcription of glycolytic genes. SNU423 cells were transfected with NEAT1\_2 siRNA or a control siRNA, and measured for HK2 and LDHA promoter activity using luciferase reporter. Data represent mean  $\pm$  SEM (n = 3). p value was determined by unpaired two-tailed Student's t test; ns, not significant.

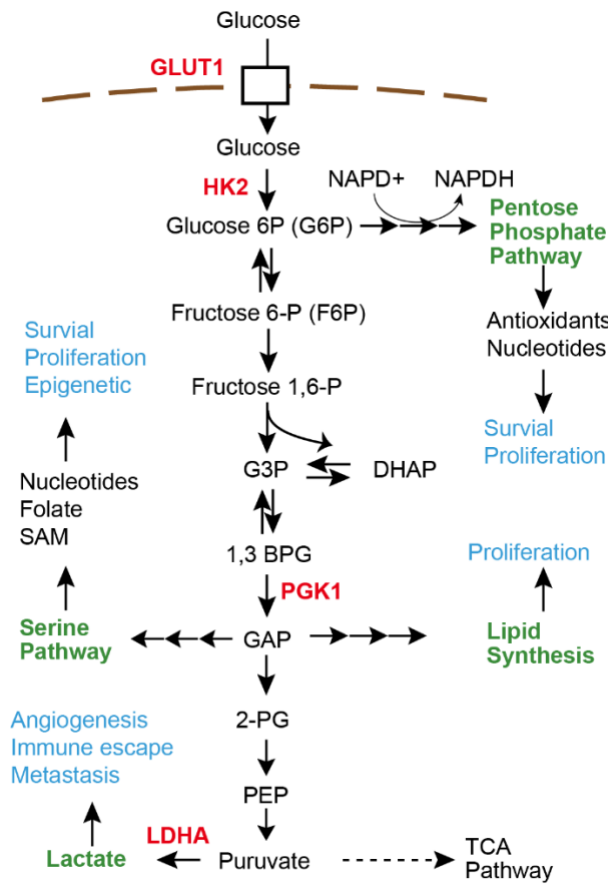

**Figure S8. mTORC1-NEAT1 signaling regulates aerobic glycolysis in HCC cells, which is important for rapamycin's action.** Shown is glycolysis pathway with key metabolic genes regulated by mTORC1-NEAT1 axis marked in red.

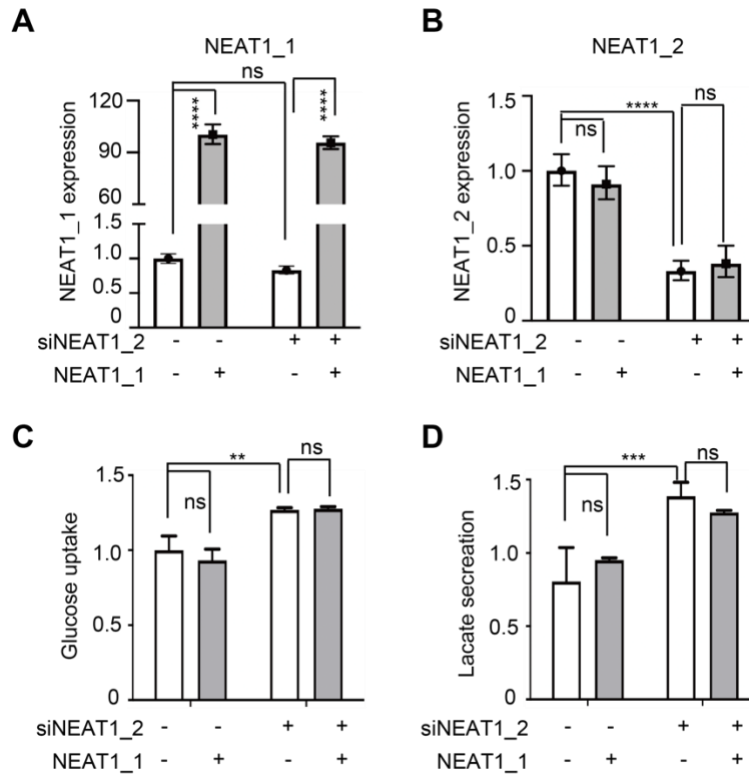

**Figure S9. NEAT1\_1 showed moderate effect on glucose metabolism in HCC cells.** (A) NEAT1\_1 was ectopically overexpressed in HCC cells. SNU423 cells were transfected without or with pCDNA3.1-NEAT1\_1 plasmid in the absence or presence of NEAT1\_2 knockdown and analyzed for NEAT1\_1 expression by qRT-PCR. NEAT1\_1 expression was calculated as relative to ACTIN. Bar graphs represent mean  $\pm$  SEM (n = 3). Data are shown as mean  $\pm$  SEM (n = 3); Statistical significance was tested using two-tailed unpaired t test. \*\*\*\* p < 0.0001, ns, not significant. (B) NEAT1\_2 was specifically knockdown in SNU423 cells. SNU423 cells were transfected without or with pCDNA3.1-NEAT1\_1 plasmid in the absence or presence of NEAT1\_2 knockdown and analyzed for NEAT1\_2 expression by qRT-PCR. NEAT1\_2 expression was calculated as relative to ACTIN. Bar graphs represent mean  $\pm$  SEM (n = 3). Data are shown as mean  $\pm$  SEM (n = 3); Statistical significance was tested using two-tailed unpaired t test. \*\*\*\* p < 0.0001, ns, not significant. (C-D) NEAT1\_2, not NEAT1\_1 regulates glucose uptake and lactate secretion in HCC cells. SNU423 cells were transfected without or with pCDNA3.1-NEAT1\_1 plasmid in the absence or presence of NEAT1\_2 knockdown and measured for glucose uptake (C) or lactate secretion

(D). Data was normalized to cell number and presented as mean  $\pm$  SEM and analyzed by unpaired two-tail Student's *t* test; \*  $p < 0.05$ ; ns, not significant.



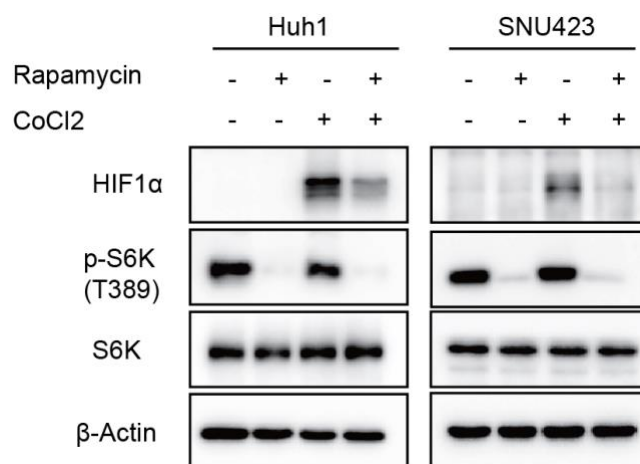

**Figure S11. mTORC1 regulates HIF-1 $\alpha$  protein expression under hypoxia, but not normoxia.** Huh1 and SNU423 cells were treated without or with 100 nM rapamycin treatment for 24 h under hypoxia (+100  $\mu$ M CoCl<sub>2</sub>) or normoxia (-100  $\mu$ M CoCl<sub>2</sub>). HIF1 $\alpha$  protein, p-S6K1 and S6K1 protein were analyzed by immunoblot.  $\beta$ -Actin was used as an internal control.

## SUPPLEMENTARY TABLES

**Table S1.** Significantly Altered lncRNAs by Rapamycin in HCC

| Gene_Name         | RaPa_<br>FPKM | ctrl_<br>FPKM | FC<br>(Rapa/ctrl) | p value |
|-------------------|---------------|---------------|-------------------|---------|
| LURAP1L-AS1       | 2.11          | 0.46          | 4.59              | 0.01    |
| HOXB-AS4          | 0.50          | 2.09          | 0.24              | 0.05    |
| RP11-12J10.4      | 0.34          | 2.18          | 0.15              | 0.01    |
| CTC-425F1.4       | 11.84         | 0.00          | #DIV/0!           | 0.00    |
| RP11-148B18.3     | 5.11          | 0.00          | #DIV/0!           | 0.00    |
| RP11-70C1.3       | 10.17         | 0.00          | #DIV/0!           | 0.00    |
| RP11-498C9.4      | 5.16          | 0.31          | 16.51             | 0.04    |
| RP11-229E13.4     | 25775.00      | 1562.52       | 16.50             | 0.00    |
| KDM4A-AS1         | 2.28          | 0.17          | 13.59             | 0.03    |
| SNHG12            | 4.30          | 0.38          | 11.38             | 0.00    |
| SCARNA9           | 143.07        | 15.07         | 9.50              | 0.00    |
| CTB-12A17.3       | 18.08         | 2.10          | 8.62              | 0.00    |
| XXbac-BPG252P9.10 | 4.64          | 0.56          | 8.34              | 0.00    |
| RMRP              | 1070000.00    | 129244.00     | 8.28              | 0.05    |
| CTD-2269F5.1      | 13.38         | 1.81          | 7.40              | 0.05    |
| SNHG8             | 202.29        | 32.94         | 6.14              | 0.00    |
| RP11-225B17.2     | 3.43          | 0.56          | 6.13              | 0.03    |
| RP11-386I14.4     | 129.20        | 22.55         | 5.73              | 0.01    |
| AC010761.10       | 12.90         | 2.35          | 5.49              | 0.01    |

|                  |          |          |      |      |
|------------------|----------|----------|------|------|
| PSMA3-AS1        | 6.62     | 1.21     | 5.48 | 0.00 |
| SNHG3            | 404.84   | 78.27    | 5.17 | 0.05 |
| EPHA5-AS1        | 6.69     | 1.38     | 4.84 | 0.00 |
| SNHG1            | 12.01    | 2.90     | 4.13 | 0.00 |
| AC108488.4       | 4.51     | 1.13     | 3.98 | 0.05 |
| XXbac-B444P24.14 | 2.74     | 0.69     | 3.94 | 0.04 |
| AC108142.1       | 5.64     | 1.44     | 3.92 | 0.00 |
| CTC-367J11.1     | 5.26     | 1.36     | 3.88 | 0.04 |
| RP11-140K17.3    | 7.82     | 2.05     | 3.82 | 0.02 |
| ZNF667-AS1       | 2.89     | 0.76     | 3.81 | 0.03 |
| APCDD1L-AS1      | 5.49     | 1.46     | 3.76 | 0.01 |
| CH17-373J23.1    | 67.50    | 18.04    | 3.74 | 0.00 |
| RP11-547C5.1     | 25.46    | 6.92     | 3.68 | 0.02 |
| RP11-392P7.6     | 5.77     | 1.61     | 3.59 | 0.00 |
| COX10-AS1        | 2.30     | 0.64     | 3.57 | 0.00 |
| OIP5-AS1         | 4.16     | 1.17     | 3.57 | 0.01 |
| AC002467.7       | 2.89     | 0.82     | 3.52 | 0.02 |
| RP11-805J14.5    | 13.37    | 3.81     | 3.51 | 0.00 |
| RP11-1148L6.8    | 7.86     | 2.31     | 3.40 | 0.01 |
| THUMPD3-AS1      | 12.49    | 3.67     | 3.40 | 0.00 |
| RPPH1            | 60389.20 | 17932.70 | 3.37 | 0.05 |
| MIR17HG          | 3.41     | 1.05     | 3.26 | 0.00 |
| LINC00702        | 13.63    | 4.26     | 3.20 | 0.00 |

|                |         |         |      |      |
|----------------|---------|---------|------|------|
| RP11-6N17.4    | 30.39   | 9.69    | 3.14 | 0.00 |
| RP1-261G23.7   | 570.50  | 184.75  | 3.09 | 0.05 |
| FGD5-AS1       | 3.85    | 1.33    | 2.91 | 0.01 |
| CTD-2269F5.1   | 2.64    | 0.92    | 2.87 | 0.02 |
| SCARNA10       | 4399.26 | 1536.96 | 2.86 | 0.00 |
| CRNDE          | 20.92   | 7.75    | 2.70 | 0.00 |
| RP11-1069G10.2 | 3.37    | 1.27    | 2.65 | 0.02 |
| LINC00998      | 51.01   | 19.38   | 2.63 | 0.00 |
| RP11-417L19.6  | 21.00   | 7.98    | 2.63 | 0.03 |
| ZFAS1          | 55.34   | 22.81   | 2.43 | 0.00 |
| ZBED5-AS1      | 4.06    | 1.68    | 2.41 | 0.02 |
| ERVK3-1        | 9.84    | 4.08    | 2.41 | 0.01 |
| RNU12          | 23.12   | 9.75    | 2.37 | 0.00 |
| CH507-513H4.5  | 5.28    | 2.23    | 2.37 | 0.01 |
| SNHG6          | 113.29  | 47.91   | 2.36 | 0.00 |
| RP4-738P15.6   | 72.43   | 31.05   | 2.33 | 0.01 |
| CTD-2256P15.4  | 27.30   | 11.80   | 2.31 | 0.00 |
| MAPKAPK5-AS1   | 4.25    | 1.86    | 2.29 | 0.04 |
| TTC28-AS1      | 5.64    | 2.47    | 2.29 | 0.02 |
| NEAT1          | 17.12   | 7.62    | 2.25 | 0.03 |
| CTD-2545M3.2   | 28.85   | 13.20   | 2.19 | 0.02 |
| SNHG5          | 187.14  | 86.66   | 2.16 | 0.00 |
| CH507-513H4.4  | 11.83   | 5.49    | 2.15 | 0.01 |

|               |        |        |      |      |
|---------------|--------|--------|------|------|
| CTD-3014M21.1 | 4.75   | 2.26   | 2.10 | 0.03 |
| RP11-101E13.5 | 13.18  | 6.30   | 2.09 | 0.02 |
| LRRC75A-AS1   | 256.30 | 123.47 | 2.08 | 0.00 |
| RAB30-AS1     | 26.37  | 12.84  | 2.05 | 0.02 |
| CH507-513H4.6 | 11.41  | 5.60   | 2.04 | 0.02 |
| ANKRD10-IT1   | 10.17  | 5.00   | 2.03 | 0.03 |
| RP11-394B2.1  | 3.17   | 6.30   | 0.50 | 0.01 |
| RAET1E-AS1    | 9.44   | 18.80  | 0.50 | 0.01 |
| STEAP3-AS1    | 1.86   | 3.71   | 0.50 | 0.02 |
| RP11-342D11.2 | 7.66   | 15.31  | 0.50 | 0.03 |
| RP11-1055B8.1 | 1.57   | 3.15   | 0.50 | 0.05 |
| RP11-46D6.1   | 2.91   | 5.88   | 0.50 | 0.02 |
| RP11-473I1.5  | 9.89   | 20.01  | 0.49 | 0.02 |
| RP3-430N8.11  | 7.98   | 16.18  | 0.49 | 0.03 |
| RP11-214O1.2  | 2.27   | 4.63   | 0.49 | 0.03 |
| AC093110.3    | 4.95   | 10.23  | 0.48 | 0.04 |
| RP11-175O19.4 | 2.03   | 4.22   | 0.48 | 0.01 |
| RP11-366L20.2 | 1.44   | 3.00   | 0.48 | 0.01 |
| AC009133.15   | 29.58  | 61.88  | 0.48 | 0.01 |
| RP11-96K19.5  | 1.77   | 3.75   | 0.47 | 0.03 |
| FRMD6-AS1     | 1.24   | 2.62   | 0.47 | 0.02 |
| MED14OS       | 3.91   | 8.28   | 0.47 | 0.02 |
| CTD-2033D15.3 | 5.79   | 12.28  | 0.47 | 0.03 |

|               |       |       |      |      |
|---------------|-------|-------|------|------|
| RP11-618K13.2 | 10.52 | 22.35 | 0.47 | 0.03 |
| LINC01578     | 4.39  | 9.34  | 0.47 | 0.04 |
| RP11-7F17.8   | 1.05  | 2.28  | 0.46 | 0.01 |
| SPRY4-IT1     | 2.40  | 5.21  | 0.46 | 0.04 |
| RP11-803D5.1  | 1.15  | 2.51  | 0.46 | 0.01 |
| RP11-815I9.4  | 1.54  | 3.40  | 0.45 | 0.02 |
| AC009120.6    | 9.51  | 21.09 | 0.45 | 0.02 |
| RP11-88I18.2  | 2.07  | 4.60  | 0.45 | 0.01 |
| RP11-334J6.7  | 8.26  | 18.38 | 0.45 | 0.00 |
| RP5-875O13.1  | 1.05  | 2.35  | 0.45 | 0.03 |
| RP11-73M18.7  | 2.56  | 5.72  | 0.45 | 0.04 |
| AC092669.3    | 2.24  | 5.05  | 0.44 | 0.01 |
| CTD-2574D22.3 | 0.98  | 2.21  | 0.44 | 0.02 |
| RP11-706O15.1 | 4.15  | 9.39  | 0.44 | 0.02 |
| UGDH-AS1      | 1.95  | 4.46  | 0.44 | 0.00 |
| CTD-2291D10.4 | 2.88  | 6.57  | 0.44 | 0.04 |
| BCYRN1        | 0.97  | 2.24  | 0.43 | 0.00 |
| RP11-295D4.1  | 1.06  | 2.45  | 0.43 | 0.01 |
| CASC2         | 2.53  | 5.86  | 0.43 | 0.03 |
| CTC-250I14.6  | 32.48 | 75.34 | 0.43 | 0.00 |
| PRKAR2A-AS1   | 3.03  | 7.04  | 0.43 | 0.01 |
| RP11-382B18.1 | 0.97  | 2.26  | 0.43 | 0.01 |
| LINC00667     | 3.05  | 7.09  | 0.43 | 0.03 |

|                |       |       |      |      |
|----------------|-------|-------|------|------|
| RP1-117B12.4   | 22.93 | 53.48 | 0.43 | 0.00 |
| RP11-500C11.3  | 22.35 | 52.37 | 0.43 | 0.00 |
| RP11-274B21.14 | 1.73  | 4.10  | 0.42 | 0.01 |
| AC092171.4     | 1.68  | 3.97  | 0.42 | 0.00 |
| AC005786.7     | 8.84  | 21.11 | 0.42 | 0.01 |
| RP11-843B15.4  | 4.09  | 9.81  | 0.42 | 0.02 |
| CTC-338M12.4   | 2.83  | 6.81  | 0.42 | 0.02 |
| AC006547.15    | 2.31  | 5.58  | 0.41 | 0.03 |
| HCG18          | 1.16  | 2.88  | 0.40 | 0.00 |
| RP11-306O13.1  | 1.19  | 2.94  | 0.40 | 0.01 |
| CTD-2231E14.2  | 3.33  | 8.26  | 0.40 | 0.00 |
| CTB-31O20.3    | 4.22  | 10.48 | 0.40 | 0.02 |
| CTB-31O20.9    | 1.72  | 4.27  | 0.40 | 0.04 |
| AC005682.5     | 1.46  | 3.64  | 0.40 | 0.05 |
| RP11-635L1.2   | 0.96  | 2.42  | 0.40 | 0.05 |
| RP11-138A9.1   | 1.04  | 2.64  | 0.40 | 0.01 |
| RP11-196G11.3  | 1.43  | 3.63  | 0.39 | 0.00 |
| AC007743.1     | 0.93  | 2.37  | 0.39 | 0.00 |
| RP11-445F12.2  | 2.36  | 6.03  | 0.39 | 0.02 |
| LLNLR-284B4.1  | 15.25 | 39.04 | 0.39 | 0.00 |
| PSMA3-AS1      | 1.22  | 3.13  | 0.39 | 0.03 |
| RP11-263K19.6  | 1.62  | 4.15  | 0.39 | 0.03 |
| RP11-706O15.3  | 1.18  | 3.05  | 0.39 | 0.01 |

|                   |        |        |      |      |
|-------------------|--------|--------|------|------|
| RP11-103H7.5      | 1.73   | 4.52   | 0.38 | 0.04 |
| LINC01551         | 0.88   | 2.30   | 0.38 | 0.01 |
| RP11-580I16.2     | 3.54   | 9.34   | 0.38 | 0.02 |
| EAF1-AS1          | 0.88   | 2.33   | 0.38 | 0.03 |
| NOP14-AS1         | 2.67   | 7.35   | 0.36 | 0.00 |
| XXbac-BPG181M17.6 | 4.16   | 11.44  | 0.36 | 0.00 |
| RP11-259O2.3      | 7.87   | 21.93  | 0.36 | 0.00 |
| RP4-742J24.2      | 0.85   | 2.42   | 0.35 | 0.00 |
| RP11-801F7.1      | 3.24   | 9.28   | 0.35 | 0.00 |
| RP11-627G18.1     | 1.54   | 4.52   | 0.34 | 0.01 |
| RP11-73M18.6      | 0.94   | 2.79   | 0.34 | 0.05 |
| CTD-2510F5.4      | 6.56   | 19.46  | 0.34 | 0.01 |
| WNT5A-AS1         | 1.38   | 4.15   | 0.33 | 0.03 |
| CTC-458I2.2       | 0.85   | 2.56   | 0.33 | 0.03 |
| RP11-256P1.1      | 10.40  | 31.75  | 0.33 | 0.00 |
| RP11-442H21.2     | 6.52   | 20.00  | 0.33 | 0.00 |
| AC017002.2        | 2.31   | 7.12   | 0.32 | 0.00 |
| U91328.21         | 2.24   | 6.96   | 0.32 | 0.04 |
| AC079305.10       | 2.26   | 7.10   | 0.32 | 0.01 |
| CTD-3193O13.13    | 1.80   | 5.76   | 0.31 | 0.02 |
| MALAT1            | 163.48 | 524.77 | 0.31 | 0.00 |
| RP11-385F5.5      | 0.86   | 2.76   | 0.31 | 0.04 |
| NAV2-AS1          | 1.79   | 5.95   | 0.30 | 0.00 |

|               |       |       |      |      |
|---------------|-------|-------|------|------|
| RP11-618G20.1 | 3.00  | 9.98  | 0.30 | 0.00 |
| RP11-20G6.1   | 1.29  | 4.43  | 0.29 | 0.02 |
| RP11-530C5.1  | 19.62 | 67.90 | 0.29 | 0.00 |
| RP11-732A21.3 | 1.17  | 4.09  | 0.28 | 0.00 |
| MBNL1-AS1     | 0.79  | 2.79  | 0.28 | 0.01 |
| LINC00969     | 0.87  | 3.21  | 0.27 | 0.00 |
| PKD1P6        | 0.92  | 3.40  | 0.27 | 0.02 |
| CTC-436P18.1  | 2.06  | 7.61  | 0.27 | 0.00 |
| RP11-109P14.9 | 0.86  | 3.24  | 0.26 | 0.00 |
| UXT-AS1       | 1.93  | 7.53  | 0.26 | 0.00 |
| RP11-334E6.10 | 1.82  | 7.13  | 0.26 | 0.00 |
| RP11-489E7.4  | 2.15  | 8.46  | 0.25 | 0.00 |
| SNHG17        | 2.10  | 8.43  | 0.25 | 0.00 |
| RP11-455O6.8  | 1.14  | 4.67  | 0.25 | 0.00 |
| LINC01184     | 0.98  | 4.05  | 0.24 | 0.01 |
| RP11-45M22.2  | 0.71  | 3.01  | 0.24 | 0.00 |
| RP11-96L14.7  | 1.41  | 6.02  | 0.23 | 0.00 |
| RP11-452K12.7 | 2.11  | 9.19  | 0.23 | 0.00 |
| CH17-189H20.1 | 0.92  | 4.97  | 0.19 | 0.00 |
| AC005262.2    | 4.75  | 26.61 | 0.18 | 0.00 |
| RP11-365N19.2 | 0.56  | 3.41  | 0.16 | 0.00 |
| SNHG1         | 0.74  | 4.59  | 0.16 | 0.00 |
| RP11-867G23.4 | 2.65  | 18.27 | 0.15 | 0.00 |

|               |      |       |      |      |
|---------------|------|-------|------|------|
| AL109763.2    | 0.39 | 2.83  | 0.14 | 0.00 |
| CTBP1-AS2     | 0.30 | 2.40  | 0.13 | 0.00 |
| SATB2-AS1     | 0.21 | 2.43  | 0.08 | 0.03 |
| CTD-2135D7.2  | 0.00 | 3.24  | 0.00 | 0.00 |
| CTD-2349P21.7 | 0.00 | 43.81 | 0.00 | 0.01 |
| DANCR         | 0.00 | 12.36 | 0.00 | 0.00 |
| HOXB-AS3      | 0.00 | 2.94  | 0.00 | 0.02 |
| LINC00963     | 0.00 | 7.08  | 0.00 | 0.00 |
| LINC01535     | 0.00 | 2.95  | 0.00 | 0.00 |
| RP11-290M5.4  | 0.00 | 6.15  | 0.00 | 0.04 |
| RP11-373D23.2 | 0.00 | 2.93  | 0.00 | 0.04 |
| TUG1          | 0.00 | 2.27  | 0.00 | 0.00 |
| ZEB1-AS1      | 0.00 | 3.39  | 0.00 | 0.00 |

---

**Table S2.** NONO binding motifs in glycolytic pre-mRNA

| Motif ID | Gene   | Start | End | p value  | Matched<br>sequence |
|----------|--------|-------|-----|----------|---------------------|
| AGGGA    | GCK    | 49    | 53  | 0.000977 | aggga               |
| AGGGA    | ALDOA  | 55    | 59  | 0.000977 | aggga               |
| AGGGA    | ALDOA  | 64    | 68  | 0.000977 | aggga               |
| AGGGA    | SLC2A1 | 67    | 71  | 0.000977 | AGGGA               |
| AGGGA    | ALDOA  | 71    | 75  | 0.000977 | aggga               |
| AGGGA    | ALDOA  | 92    | 96  | 0.000977 | aggga               |
| AGGGA    | ALDOA  | 104   | 108 | 0.000977 | aggga               |
| AGGGA    | LDHA   | 106   | 110 | 0.000977 | aggga               |
| AGGGA    | GCK    | 124   | 128 | 0.000977 | aggga               |
| AGGGA    | PGK1   | 138   | 142 | 0.000977 | AGGGA               |
| AGGGA    | LDHA   | 163   | 167 | 0.000977 | aggga               |
| AGGGA    | GCK    | 275   | 279 | 0.000977 | aggga               |
| AGGGA    | GCK    | 372   | 376 | 0.000977 | aggga               |
| AGGGA    | PGK1   | 517   | 521 | 0.000977 | AGGGA               |
| AGGGA    | HK2    | 525   | 529 | 0.000977 | AGGGA               |
| AGGGA    | LDHA   | 599   | 603 | 0.000977 | aggga               |
| AGGGA    | HK2    | 710   | 714 | 0.000977 | AGGGA               |
| AGGGA    | LDHA   | 759   | 763 | 0.000977 | aggga               |
| AGGGA    | LDHA   | 786   | 790 | 0.000977 | aggga               |
| AGGGA    | GCK    | 811   | 815 | 0.000977 | AGGGA               |

|       |        |      |      |          |       |
|-------|--------|------|------|----------|-------|
| AGGGA | GCK    | 920  | 924  | 0.000977 | AGGGA |
| AGGGA | SLC2A1 | 1086 | 1090 | 0.000977 | aggga |
| AGGGA | PFKL   | 1149 | 1153 | 0.000977 | AGGGA |
| AGGGA | ALDOA  | 1251 | 1255 | 0.000977 | aggga |
| AGGGA | ALDOA  | 1309 | 1313 | 0.000977 | aggga |
| AGGGA | PGK1   | 1375 | 1379 | 0.000977 | AGGGA |
| AGGGA | GCK    | 1447 | 1451 | 0.000977 | AGGGA |
| AGGGA | GCK    | 1599 | 1603 | 0.000977 | AGGGA |
| AGGGA | PFKL   | 1662 | 1666 | 0.000977 | AGGGA |
| AGGGA | ALDOA  | 1684 | 1688 | 0.000977 | aggga |
| AGGGA | ALDOA  | 1697 | 1701 | 0.000977 | aggga |
| AGGGA | SLC2A1 | 1771 | 1775 | 0.000977 | aggga |
| AGGGA | PGK1   | 1830 | 1834 | 0.000977 | AGGGA |
| AGGGA | SLC2A1 | 1834 | 1838 | 0.000977 | aggga |
| AGGGA | ALDOA  | 1906 | 1910 | 0.000977 | aggga |
| AGGGA | SLC2A1 | 1955 | 1959 | 0.000977 | aggga |
| AGGGA | GCK    | 2058 | 2062 | 0.000977 | AGGGA |
| AGGGA | ALDOA  | 2058 | 2062 | 0.000977 | aggga |
| AGGGA | SLC2A1 | 2089 | 2093 | 0.000977 | aggga |
| AGGGA | PFKL   | 2239 | 2243 | 0.000977 | AGGGA |
| AGGGA | PFKL   | 2261 | 2265 | 0.000977 | AGGGA |
| AGGGA | HK2    | 2307 | 2311 | 0.000977 | aggga |
| AGGGA | HK2    | 2330 | 2334 | 0.000977 | aggga |

|       |        |      |      |          |       |
|-------|--------|------|------|----------|-------|
| AGGGA | PGK1   | 2405 | 2409 | 0.000977 | AGGGA |
| AGGGA | ALDOA  | 2787 | 2791 | 0.000977 | aggga |
| AGGGA | ALDOA  | 2861 | 2865 | 0.000977 | aggga |
| AGGGA | GCK    | 2971 | 2975 | 0.000977 | AGGGA |
| AGGGA | HK2    | 3102 | 3106 | 0.000977 | aggga |
| AGGGA | ALDOA  | 3175 | 3179 | 0.000977 | AGGGA |
| AGGGA | LDHA   | 3338 | 3342 | 0.000977 | AGGGA |
| AGGGA | ALDOA  | 3458 | 3462 | 0.000977 | AGGGA |
| AGGGA | GCK    | 3541 | 3545 | 0.000977 | AGGGA |
| AGGGA | HK2    | 3560 | 3564 | 0.000977 | aggga |
| AGGGA | LDHA   | 3573 | 3577 | 0.000977 | AGGGA |
| AGGGA | ALDOA  | 3600 | 3604 | 0.000977 | AGGGA |
| AGGGA | LDHA   | 3774 | 3778 | 0.000977 | AGGGA |
| AGGGA | SLC2A1 | 3906 | 3910 | 0.000977 | aggga |
| AGGGA | SLC2A1 | 4023 | 4027 | 0.000977 | aggga |
| AGGGA | ALDOA  | 4155 | 4159 | 0.000977 | AGGGA |
| AGGGA | SLC2A1 | 4265 | 4269 | 0.000977 | aggga |
| AGGGA | ALDOA  | 4399 | 4403 | 0.000977 | AGGGA |
| AGGGA | PFKL   | 4437 | 4441 | 0.000977 | AGGGA |
| AGGGA | PFKL   | 4447 | 4451 | 0.000977 | AGGGA |
| AGGGA | PFKL   | 4451 | 4455 | 0.000977 | AGGGA |
| AGGGA | GCK    | 4572 | 4576 | 0.000977 | AGGGA |
| AGGGA | GCK    | 4659 | 4663 | 0.000977 | AGGGA |

|       |        |      |      |          |       |
|-------|--------|------|------|----------|-------|
| AGGGA | PFKL   | 4837 | 4841 | 0.000977 | AGGGA |
| AGGGA | ALDOA  | 4865 | 4869 | 0.000977 | AGGGA |
| AGGGA | LDHA   | 4918 | 4922 | 0.000977 | AGGGA |
| AGGGA | GCK    | 4944 | 4948 | 0.000977 | AGGGA |
| AGGGA | SLC2A1 | 5042 | 5046 | 0.000977 | aggga |
| AGGGA | PGK1   | 5131 | 5135 | 0.000977 | AGGGA |
| AGGGA | PFKL   | 5329 | 5333 | 0.000977 | AGGGA |
| AGGGA | PFKL   | 5459 | 5463 | 0.000977 | AGGGA |
| AGGGA | PFKL   | 5489 | 5493 | 0.000977 | AGGGA |
| AGGGA | HK2    | 5534 | 5538 | 0.000977 | aggga |
| AGGGA | ALDOA  | 5555 | 5559 | 0.000977 | AGGGA |
| AGGGA | HK2    | 5695 | 5699 | 0.000977 | aggga |
| AGGGA | HK2    | 5797 | 5801 | 0.000977 | aggga |
| AGGGA | HK2    | 5809 | 5813 | 0.000977 | aggga |
| AGGGA | GCK    | 5916 | 5920 | 0.000977 | AGGGA |
| AGGGA | GCK    | 6152 | 6156 | 0.000977 | AGGGA |
| AGGGA | LDHA   | 6335 | 6339 | 0.000977 | AGGGA |
| AGGGA | GCK    | 6448 | 6452 | 0.000977 | AGGGA |
| AGGGA | GCK    | 6655 | 6659 | 0.000977 | AGGGA |
| AGGGA | GCK    | 6682 | 6686 | 0.000977 | AGGGA |
| AGGGA | PFKL   | 6731 | 6735 | 0.000977 | AGGGA |
| AGGGA | PFKL   | 6953 | 6957 | 0.000977 | AGGGA |
| AGGGA | PGK1   | 6963 | 6967 | 0.000977 | AGGGA |

|       |        |      |      |          |       |
|-------|--------|------|------|----------|-------|
| AGGGA | PFKL   | 7093 | 7097 | 0.000977 | AGGGA |
| AGGGA | PGK1   | 7244 | 7248 | 0.000977 | AGGGA |
| AGGGA | LDHA   | 7301 | 7305 | 0.000977 | AGGGA |
| AGGGA | LDHA   | 7363 | 7367 | 0.000977 | AGGGA |
| AGGGA | PFKL   | 7574 | 7578 | 0.000977 | AGGGA |
| AGGGA | PGK1   | 7661 | 7665 | 0.000977 | AGGGA |
| AGGGA | GCK    | 7692 | 7696 | 0.000977 | AGGGA |
| AGGGA | SLC2A1 | 7737 | 7741 | 0.000977 | aggga |
| AGGGA | PFKL   | 8016 | 8020 | 0.000977 | AGGGA |
| AGGGA | PFKL   | 8210 | 8214 | 0.000977 | AGGGA |
| AGGGA | PGK1   | 8216 | 8220 | 0.000977 | AGGGA |
| AGGGA | LDHA   | 8234 | 8238 | 0.000977 | AGGGA |
| AGGGA | PFKL   | 8322 | 8326 | 0.000977 | AGGGA |
| AGGGA | SLC2A1 | 8445 | 8449 | 0.000977 | aggga |
| AGGGA | PFKL   | 8462 | 8466 | 0.000977 | AGGGA |
| AGGGA | PGK1   | 8731 | 8735 | 0.000977 | AGGGA |
| AGGGA | PFKL   | 8934 | 8938 | 0.000977 | AGGGA |
| AGGGA | SLC2A1 | 8950 | 8954 | 0.000977 | aggga |
| AGGGA | PFKL   | 9003 | 9007 | 0.000977 | AGGGA |
| AGGGA | HK2    | 9029 | 9033 | 0.000977 | aggga |
| AGGGA | PFKL   | 9065 | 9069 | 0.000977 | AGGGA |
| AGGGA | SLC2A1 | 9097 | 9101 | 0.000977 | aggga |
| AGGGA | PFKL   | 9143 | 9147 | 0.000977 | AGGGA |

|       |        |       |       |          |       |
|-------|--------|-------|-------|----------|-------|
| AGGGA | PFKL   | 9187  | 9191  | 0.000977 | AGGGA |
| AGGGA | LDHA   | 9193  | 9197  | 0.000977 | AGGGA |
| AGGGA | HK2    | 9283  | 9287  | 0.000977 | aggga |
| AGGGA | PFKL   | 9289  | 9293  | 0.000977 | AGGGA |
| AGGGA | GCK    | 9480  | 9484  | 0.000977 | AGGGA |
| AGGGA | PGK1   | 9767  | 9771  | 0.000977 | AGGGA |
| AGGGA | PFKL   | 9814  | 9818  | 0.000977 | AGGGA |
| AGGGA | HK2    | 9823  | 9827  | 0.000977 | aggga |
| AGGGA | LDHA   | 9882  | 9886  | 0.000977 | AGGGA |
| AGGGA | PGK1   | 9883  | 9887  | 0.000977 | AGGGA |
| AGGGA | PGK1   | 9888  | 9892  | 0.000977 | AGGGA |
| AGGGA | PFKL   | 9963  | 9967  | 0.000977 | AGGGA |
| AGGGA | HK2    | 10017 | 10021 | 0.000977 | aggga |
| AGGGA | PFKL   | 10067 | 10071 | 0.000977 | AGGGA |
| AGGGA | GCK    | 10164 | 10168 | 0.000977 | AGGGA |
| AGGGA | SLC2A1 | 10292 | 10296 | 0.000977 | aggga |
| AGGGA | PFKL   | 10401 | 10405 | 0.000977 | AGGGA |
| AGGGA | HK2    | 10507 | 10511 | 0.000977 | aggga |
| AGGGA | PFKL   | 10685 | 10689 | 0.000977 | AGGGA |
| AGGGA | SLC2A1 | 10703 | 10707 | 0.000977 | aggga |
| AGGGA | SLC2A1 | 10745 | 10749 | 0.000977 | aggga |
| AGGGA | PFKL   | 10973 | 10977 | 0.000977 | AGGGA |
| AGGGA | HK2    | 11169 | 11173 | 0.000977 | aggga |

|       |        |       |       |          |       |
|-------|--------|-------|-------|----------|-------|
| AGGGA | PFKL   | 11504 | 11508 | 0.000977 | AGGGA |
| AGGGA | HK2    | 11510 | 11514 | 0.000977 | aggga |
| AGGGA | SLC2A1 | 11545 | 11549 | 0.000977 | aggga |
| AGGGA | HK2    | 11583 | 11587 | 0.000977 | aggga |
| AGGGA | GCK    | 11664 | 11668 | 0.000977 | AGGGA |
| AGGGA | PGK1   | 11727 | 11731 | 0.000977 | AGGGA |
| AGGGA | SLC2A1 | 11836 | 11840 | 0.000977 | aggga |
| AGGGA | HK2    | 11852 | 11856 | 0.000977 | aggga |
| AGGGA | PFKL   | 11887 | 11891 | 0.000977 | AGGGA |
| AGGGA | PGK1   | 11961 | 11965 | 0.000977 | AGGGA |
| AGGGA | HK2    | 12062 | 12066 | 0.000977 | aggga |
| AGGGA | PFKL   | 12098 | 12102 | 0.000977 | AGGGA |
| AGGGA | GCK    | 12116 | 12120 | 0.000977 | AGGGA |
| AGGGA | PGK1   | 12179 | 12183 | 0.000977 | AGGGA |
| AGGGA | GCK    | 12283 | 12287 | 0.000977 | AGGGA |
| AGGGA | PFKL   | 12322 | 12326 | 0.000977 | AGGGA |
| AGGGA | PFKL   | 12329 | 12333 | 0.000977 | AGGGA |
| AGGGA | PFKL   | 12449 | 12453 | 0.000977 | AGGGA |
| AGGGA | SLC2A1 | 12594 | 12598 | 0.000977 | aggga |
| AGGGA | GCK    | 12629 | 12633 | 0.000977 | AGGGA |
| AGGGA | SLC2A1 | 12735 | 12739 | 0.000977 | aggga |
| AGGGA | PGK1   | 12739 | 12743 | 0.000977 | AGGGA |
| AGGGA | PGK1   | 12854 | 12858 | 0.000977 | AGGGA |

|       |        |       |       |          |       |
|-------|--------|-------|-------|----------|-------|
| AGGGA | PGK1   | 12864 | 12868 | 0.000977 | AGGGA |
| AGGGA | GCK    | 13220 | 13224 | 0.000977 | AGGGA |
| AGGGA | HK2    | 13388 | 13392 | 0.000977 | aggga |
| AGGGA | LDHA   | 13399 | 13403 | 0.000977 | aggga |
| AGGGA | PFKL   | 13522 | 13526 | 0.000977 | AGGGA |
| AGGGA | LDHA   | 13587 | 13591 | 0.000977 | aggga |
| AGGGA | PGK1   | 13678 | 13682 | 0.000977 | AGGGA |
| AGGGA | PGK1   | 13764 | 13768 | 0.000977 | AGGGA |
| AGGGA | PFKL   | 13800 | 13804 | 0.000977 | AGGGA |
| AGGGA | SLC2A1 | 13942 | 13946 | 0.000977 | aggga |
| AGGGA | SLC2A1 | 14020 | 14024 | 0.000977 | aggga |
| AGGGA | GCK    | 14021 | 14025 | 0.000977 | AGGGA |
| AGGGA | SLC2A1 | 14044 | 14048 | 0.000977 | aggga |
| AGGGA | PFKL   | 14309 | 14313 | 0.000977 | AGGGA |
| AGGGA | PGK1   | 14401 | 14405 | 0.000977 | AGGGA |
| AGGGA | PGK1   | 14414 | 14418 | 0.000977 | AGGGA |
| AGGGA | PGK1   | 14469 | 14473 | 0.000977 | AGGGA |
| AGGGA | PGK1   | 14477 | 14481 | 0.000977 | AGGGA |
| AGGGA | PFKL   | 14534 | 14538 | 0.000977 | AGGGA |
| AGGGA | PGK1   | 14577 | 14581 | 0.000977 | AGGGA |
| AGGGA | PGK1   | 14765 | 14769 | 0.000977 | AGGGA |
| AGGGA | GCK    | 14795 | 14799 | 0.000977 | AGGGA |
| AGGGA | GCK    | 14803 | 14807 | 0.000977 | AGGGA |

|       |        |       |       |          |       |
|-------|--------|-------|-------|----------|-------|
| AGGGA | GCK    | 14827 | 14831 | 0.000977 | AGGGA |
| AGGGA | GCK    | 14837 | 14841 | 0.000977 | AGGGA |
| AGGGA | GCK    | 14847 | 14851 | 0.000977 | AGGGA |
| AGGGA | GCK    | 14853 | 14857 | 0.000977 | AGGGA |
| AGGGA | PGK1   | 15024 | 15028 | 0.000977 | AGGGA |
| AGGGA | PFKL   | 15111 | 15115 | 0.000977 | AGGGA |
| AGGGA | GCK    | 15173 | 15177 | 0.000977 | AGGGA |
| AGGGA | HK2    | 15225 | 15229 | 0.000977 | aggga |
| AGGGA | SLC2A1 | 15247 | 15251 | 0.000977 | aggga |
| AGGGA | PFKL   | 15326 | 15330 | 0.000977 | AGGGA |
| AGGGA | PGK1   | 15374 | 15378 | 0.000977 | AGGGA |
| AGGGA | HK2    | 15926 | 15930 | 0.000977 | aggga |

---

**Table S3.** Small interfering RNA (siRNA)

| Target gene | Strand    | Sequence(5' ->3')           |
|-------------|-----------|-----------------------------|
| NEAT1       | Sense     | CUGGUAUGUUGCUCUGUAUGGUAdAdG |
|             | Antisense | CUUACCAUACAGAGCAACAUACCAGUA |
| NEAT1_2     | Sense     | GGGUAAAUCUCAAUUUAAAdTdT     |
|             | Antisense | UUAAGAUUGAGAUUUACCCdAdG     |
| NONO-1      | Sense     | GCAUUCCUGAAGUCUCUAAdTdT     |
|             | Antisense | UUAGAGACUUCAGGAAUGCdTdT     |
| NONO-2      | Sense     | GCCAGAAUUCUACCCUGGAAAdTdT   |
|             | Antisense | UUUCCAGGGUAGAAUUCUGGCdTdT   |
| siNC        | Sense     | UUCUCCGAACGUGUCACGUTT       |
|             | Antisense | ACGUGACACGUUCGGAGAATT       |

**Table S4.** DNA primers for quantification of gene expression

| Target    | Strand  | Sequence(5'→3')             |
|-----------|---------|-----------------------------|
| NEAT1     | Forward | CAATTACTGTCGTTGGGATTTAGAGTG |
|           | Reverse | TTCTTACCATACAGAGCAACATACCAG |
| NEAT1-2   | Forward | CAGTTAGTTTATCAGTTCTCCCATCCA |
|           | Reverse | GTTGTTGTCGTCACCTTTCAACTCT   |
| NONO      | Forward | GGCAGGCGAAGTCTTCATTCA       |
|           | Reverse | TGGCAATCTCCGCTAGGGT         |
| ACTIN     | Forward | TCCCTGGAGAAGAGCTACGA        |
|           | Reverse | AGCACTGTGTTGGCGTACAG        |
| GAPDH     | Forward | CGAGATCCCTCCAAAATCAA        |
|           | Reverse | TTCACACCCATGACGAACAT        |
| GLUT1     | Forward | ACCATTGGCTCCGGTATCG         |
|           | Reverse | GCTCGCTCCACCACAAACA         |
| Unspliced | Forward | ACCATTGGCTCCGGTATCG         |
| GLUT1     | Reverse | GCTGTGGGCAGAGACAGTGT        |
| HK2       | Forward | ACCCGGGAAAGCAACTGTTTG       |
|           | Reverse | TCACCAGGATAAGCCTCACCAG      |
| Unspliced | Forward | GAAGTTGCACGTGTGCGCAT        |
| HK2       | Reverse | TCACCAGGATAAGCCTCACCAG      |
| PGK1      | Forward | GACCTAATGTCCAAAGCTGAGAA     |
|           | Reverse | CAGCAGGTATGCCAGAAGCC        |
| Unspliced | Forward | GACCTAATGTCCAAAGCTGAGAA     |
| PGK1      |         |                             |

|           |         |                         |
|-----------|---------|-------------------------|
|           | Reverse | CTACCAACCCACTCAAGTGA    |
| LDHA      | Forward | ATGGCAACTCTAAAGGATCAGC  |
|           | Reverse | CCAACCCCAACAACCTGTAATCT |
| Unspliced | Forward | ATGGCAACTCTAAAGGATCAGC  |
| LDHA      |         |                         |
|           | Reverse | CAGTGTGGTAGACTCTCACTTAC |

---

**Table S5.** DNA primers for constructing NEAT1 plasmids

| Expression Construct | Strand  | Sequence(5'->3')               |
|----------------------|---------|--------------------------------|
| pCDNA3.1-NEAT1_2     | Forward | ATTGGTACCGGAGTTAGCGACAGGGAGGG  |
|                      |         | ATGCGCGCCT                     |
|                      | Reverse | GACTCTAGACTAATGAGTTTAGAACTCAAA |
|                      |         | CTTTATTTGTG                    |
| penter1A-shNEAT1_2   | Forward | TCAGTCGACTGGATCCCCGGACAGCATACT |
|                      |         | GGCCAGAAA CTCGAG               |
|                      |         | TTTCTGGCCAGTATGCTGT TTTTGT     |
|                      |         | GATATCTAGACCCAGCT              |
|                      | Reverse | AGCTGGGTCTAGATATCCAAAAACAGCAT  |
|                      |         | ACTGGCCAGAACTCGAGTTTCTGGCCAGT  |
|                      |         | ATGCTGTCCGGGGATCCAGTCGACTGA    |

**Table S6.** Primers for ChIP-PCR

| Target   | Strand  | Sequence(5'->3')        |
|----------|---------|-------------------------|
| mNEAT1   | Forward | CTGGTTCAAGCACGCAGAAT    |
|          | Reverse | TGCTGGTCACATGAGAGAG     |
| hGAPDH   | Forward | CCACAGTCCAGTCCTGGGAACC  |
|          | Reverse | GAGCTACGTGCGCCCGTAAAA   |
| hNEAT1-1 | Forward | TGGAGGAGTCAGGAGGAATA    |
|          | Reverse | GCATGGACAAGTTGAAGAT     |
| hNEAT1-2 | Forward | GACTCCTCCATTGGTTTCATAAG |
|          | Reverse | CAGTCTCTTCCTGACTGTAT    |
| hNEAT1-3 | Forward | GTCAGAATCAAGAGATGTTAG   |
|          | Reverse | CAACTCTAACCGGCCTCTTC    |

## **Supplementary Material and Methods**

### **Cell growth assay**

The growth of liver cancer cells was determined by optimized sulforhodamine B (SRB) assay as described [1]. Briefly, cells with different treatment were seeded in triplicate in 96-well plates at an initial density of  $1 \times 10^3$  cells/well. Then, the cells were then fixed with 10% (wt/vol) trichloroacetic acid for 1 h and stained with SRB solution (0.057% w/v in 1% acetic acid) for 30 min. Following the SRB staining, 1% (vol/vol) acetic acid was used to remove the excess dye. Finally, the protein-bound dye was dissolved in 10 mM Tris solution for OD determination at 492 nm using a microplate reader. The relative growth was measured daily for 5 consecutive days.

### **Immunological reagents, immunoprecipitation and immunoblot**

The following immunological reagents were used in this study. Antibodies against GAPDH (#2118), ACTB(#4970), p-S6 (S235/236), S6 (#2217), p-S6K (T398), S6K, p-AKT(T308) (#13038), AKT (#4691), mTOR (#2983), GLUT1 (#73015), HK2 (#2867), PGK1(#68540), LDHA (#3582) ,  $\beta$ -Catenin (#8480), Arginase-1 (#93668), Stat3 (#12640) and p-Stat3(S727) (#34911) were purchased from Cell Signaling Technology (USA). Ki-67 (#Ab16667) antibodies and CK-19 (#Ab133496) were purchased from Abcam Inc. (USA). Antibodies against NONO (N8789), EFTUD2 (#HPA022021) were purchased from Sigma (USA). Antibodies against NONO (#66361-1-Ig), SFPQ (#15585-1-AP), PRPF6 (#23929-1-AP), PRPF8 (#11171-1-AP) and BRR2 (#23875-1-AP) were purchased from Proteintek (USA). Antibody against Glypican 3 (#LS-B11249) was purchased from LifeSpan Biosciences (USA).

SNU423 cells were harvested 2 h after replacement of fresh medium, and lysed in immunoprecipitation buffer (25 mM Tris-HCl pH 7.4, 150 mM NaCl, 1 mM EDTA, 1% NP-40 and 5% glycerol) with 2.5 mg/ml DSP and 1 $\times$  protease inhibitor cocktail (Sigma, USA). After incubation for 30 min at 4°C with gentle agitation, 1M Tris-HCl PH7.4 was used to end crosslinking reaction. Then the supernatants were collected by centrifugation at 12,000  $\times$  g for 15 min at 4°C. Cell lysates were incubated with IP antibody at 4°C

overnight and then with protein A/G-agarose beads (Thermo Fisher Scientific, USA) for another 2 h at 4°C. The pellets were washed with immunoprecipitation wash buffer (25 mM Tris-HCl (pH 7.4), 150 mM NaCl, 1 mM EDTA, 1% Triton and 5% glycerol) for six times, boiled in protein sample buffer and analyzed by immunoblot.

### **Duolink proximal ligation assay (PLA)**

Duolink assay was carried out based on the manufacturer's instruction. SNU423 cells with different treatments were cultured on Chamber-slides (#154526, Thermo Fisher Scientific), and fixed using 4% paraformaldehyde after cultured for 24 h. Cells were blocked with blocking solution (Sigma, USA) and then incubated with primary antibodies at 4°C overnight. Antibodies against NONO (mouse) and EFTUD2 (rabbit) that from different species were utilized. A single antibody was used as a negative control. Duolink® In Situ PLA® Probe AntiMouse MINUS with Duolink® In Situ Detection Reagents Red and Duolink® In Situ PLA® Probe Anti-Rabbit PLUS and (DUO92008, DUO92002, DUO02004, Sigma-Aldrich, USA) were used for amplification and detection of bound PLA probes. All Chamber-slides were mounted using Mounting Media with 4',6-diamidino-2-phenylindole (DAPI). Images were acquired using an Olympus fluorescence microscope. The densities of NONO within NEAT1 interacting signals were calculated from fluorescence intensities.

### **RNA preparation and quantitative reverse transcription PCR (qRT-PCR)**

Total RNA was isolated using Trizol (Thermo Fisher Scientific, USA based on manufacturer's instructions. Following digestion with RNase-free DNase I (Thermo Fisher Scientific, USA), 500 ng RNA was subjected to reverse transcription to synthesize cDNA using random-hexamer primers (Takara) and M-MLV Reverse Transcriptase (Takara). Complementary DNAs diluted 1:100 was analyzed using the SYBR Green PCR Master Mix (RNase-free DNase I (Thermo Fisher Scientific, USA). To specifically quantify NEAT1\_1, cDNA was reverse-transcribed using oligo (dT )15 primers. The details of primer sequence are listed in in the Table S3. Data were collected and analyzed using a QuantStudio 12K Flex Real-Time PCR System

(Thermo Fisher Scientific, USA). The housekeeping gene beta-Actin was used for normalization. Unspliced RNA transcripts will be detected using PCR primers flanking an exon-intron junction. Intron retention = (Expression of unspliced RNA transcripts) / (Expression of intron-excluded region).

### **RNA-seq and analysis of differentially expressed lncRNAs**

SNU423 cells were treated with 100 nM rapamycin (Selleck Chemicals, USA) or the vehicle DMSO for 2 h. After washing with ice-cold PBS, RNA was prepared using the Trizol protocol and treated with RNase-free DNase I (Thermo Fisher Scientific, USA). LncRNA library construction, RNA quality assessment, and sequencing (HiSeq4000 Sequencing platform) were performed by Novogene. Differentially expressed lncRNAs after rapamycin treatment were identified using the following procedure: raw data were first preprocessed to obtain clean data by removing sequencing adapter and low quality reads using perl scripts. Sequencing reads were aligned to the human reference genome through HISAT2 (version 2.0.4) [2]. Then Stringtie [3] was utilized for assembly of lncRNA transcripts. After basic lncRNA filtering through Cufflinks and coding potential filtering (using CPC, PfamScan, CNCI, PhyloCSF), provisional lncRNAs were determined. Cuffmerge and Cuffdiff (version 2.0.4) were then applied to calculate the RPKM (reads per kilobase per million) values and determine differentially expressed lncRNAs between control and rapamycin treated groups. We only considered non-coding RNAs that expressed at relative high levels (RPKM > 2) and showed significant changes ( $|\log_2 \text{fold change (FC)}| > 1$ , adjusted  $P < 0.05$ ) between control and treatment cells. 202 differentially expressed lncRNAs were identified.

Raw RNA sequencing data generated from this study has been deposited in Sequence Read Archive (SRA) of the NCBI under the access number SRP314313 that can be accessed through the following link: <https://dataview.ncbi.nlm.nih.gov/object/PRJNA721096?reviewer=mm3edm3d3g2bmi8l5mg5goq5l0>.

### **Chromatin immunoprecipitation (ChIP) assay**

Cells ( $3 \times 10^7$ ) were suspended in 3.7% formaldehyde at room temperature for 10 min and then blocked by addition of glycine to a final concentration of 0.25 M for 5 min on ice. After centrifugation at 1,000 r.p.m.

for 5 min, cell pellets were resuspended in 500 µl lysis buffer (50 mM Tris pH 8.0, 5 mM EDTA, 150 mM NaCl, 1% Triton X-100, 0.1% sodium deoxycholate, proteinase inhibitor cocktail). Chromatin shearing was performed by sonication with Diagenode's Bioruptor® (Diagenode, USA) to generate 300–600 bp DNA fragments, which were collected in the supernatant after centrifugation at 12,000 g for 15 min at 4°C. The supernatant was incubated with anti-STAT3 antibody (CST, USA) at 4°C overnight and then with protein A/G-agarose beads (Thermo Fisher Scientific, USA) for another 3 h at 4°C. Following the incubation, the beads were washed with 600 µl SDS lysis buffer (50 mM Tris-HCl at pH 8.0, 10 mM EDTA, 0.5 M NaCl, 1% SDS), following with 600 µl TE Buffer (10 mM Tris pH 8.0, 1 mM EDTA) for twice at 4°C. Finally, the protein-DNA complex was eluted by adding 150 µl freshly prepared elution buffer (50 mM Tris pH 8, 10 mM EDTA, 1% SDS). Reverse crosslinking was performed by adding NaCl and incubating at 65 °C for 4 h, followed by a supplement of EDTA and proteinase K at 55 °C for 2 h. DNA was purified for PCR analysis. Primers are listed in the Table S3.

### **Splicing reporter assay**

$4 \times 10^4$  SNU423 cells were plated in a 12-well plate. After culturing overnight, cells were co-transfected with NEAT1\_2-specific siRNA and the pTN24 splicing reporter plasmid, which expresses a functional luciferase upon removal of a translation termination signal sequence by splicing, and expresses constitutive  $\beta$ -galactosidase reporter for normalization. 48 h after transfection and rapamycin treatment, cells were harvested for detection of reporter expression using the Dual Light Reporter System (Applied Biosystems) as previously described [4]. Data was analyzed by calculating the ratio of luciferase to  $\beta$ -galactosidase signals. Statistical analysis was performed with Student's t-test.

### **RNAscope assay**

RNAscope was performed based on the manufacturer's instructions (Advanced Cell Diagnostics, Newark, CA, USA) and the RNAscope probe targeting NEAT1-2 was designed and synthesized by Advanced Cell Diagnostics company. After baking, paraffin-embedded liver sections (4-µm thick) were dewaxed in xylene

and 100% ethyl alcohol for 2 min each and treated with PBS for 10 min, followed by treatment with RNAscope® Target Retrieval Reagents and hydrogen peroxide (Advanced Cell Diagnostics, Newark, CA, USA). Probes were then added and incubated for 2 h at 40°C in a humidity control chamber. Signal amplification and detection reagents (Advanced Cell Diagnostics, Newark, CA, USA) were sequentially applied and incubated in AMP 1, AMP 2, AMP 3, AMP 4, AMP 5, and AMP 6 reagents, for 30, 15, 30, 15, 30, 15 min, respectively. Detection of NEAT1\_2 expression signals was performed using an RNAscope 2.5 High Definition (HD)-BROWN Detection Reagent (Advanced Cell Diagnostics, Newark, CA, USA). The slides were then counterstained with 50% hematoxylin I (Sigma, USA) for 2 min at room temperature followed by tap water rinse. Finally, slides were then dehydrated with 70%, 80%, 95% and 100% ethyl alcohol gradients for 2 min each, followed by xylene treatment for 5 min. Mounting media and cover slips were then added to each slides for imaging. The images were acquired with an Olympus microscope.

#### **RNA fluorescence in situ hybridization (RNA-FISH) and immunofluorescence staining**

NEAT1\_2 RNA-FISH was carried out using Stellaris FISH probes (human, SMF-2037-1; mouse, SMF-3010-1) according to the manufacturer's protocol. Briefly, cells were rinsed with ice-cold PBS and then fixed in 4% formaldehyde in PBS (pH 7.4) for 15 min at room temperature. Cells were next immersed in 70% ethanol for at least 1 h at 4°C, followed by permeabilization in PBS containing 0.25% Triton X-100 for 10 min. Hybridization was subsequently performed using Stellaris® FISH Probes (LGC Biosearch Technologies, USA) at 37°C overnight in a moist chamber. Cells were washed with PBS and then counterstained with DAPI. Finally, cells were mounted with Vectashield Anti-Fade mounting medium (Vector Laboratories). For simultaneous immunofluorescence staining of NONO, after RNA-FISH, cells were again fixed for 15 min in 1% formaldehyde and immunofluorescence staining were performed using NONO primary antibody (Sigma, USA). Images were acquired in multi-tracking mode using an Olympus scanning. NEAT1\_2 or NEAT1\_2-NONO quantification was performed by taking at least 25 cells per group at a 60× magnification and densities of NONO within NEAT1\_2 containing speckles were calculated from fluorescence signals.

### **Gene expression and survival analysis in TCGA HCC dataset**

The expression of lncRNA candidates in tumors and normal tissues were analyzed using the HCC dataset (369 primary HCC and 160 normal liver tissues) of GEPIA database. mRNA expression data of NEAT1\_2 and NEAT1\_1 transcript was analyzed and downloaded from UCSC Xena platform (<https://xenabrowser.net/>) [5]. The expression data are first log2 (TPM+1) transformed and the differential analysis here is based on the selected datasets (“TCGA tumors vs TCGA normal + GTEx normal”). Further overall survival analysis was performed with high and low NEAT1 expression in 371 primary HCC tissues to evaluate the correlation of NEAT1 expressions with HCC patients overall survival.

### **Glucose uptake, lactate production and Seahorse assays**

SNU423 cells were seeded at  $2 \times 10^5$  cells/ml into 6-well plates and transfected with specific siRNA against NEAT1\_2 with Lipofectamine 3000 (Thermo Fisher Scientific, USA) based on the manufacturer’s instructions. Cells were trypsinized and seeded into black-walled clear-bottomed 96-well plates (Costar, USA). Cells were then changed with fresh culture medium with 100 nM rapamycin for 24 h and measured for glucose uptake (#J1341, Promega) and lactate production (#J5021, Promega) according to manufacturer’s instructions.

The extracellular acidification rate (ECAR) was determined using a XF24 Extracellular Flux Analyzer (Seahorse Bioscience) based on the manufacturer’s instructions. Briefly, cells were plated at  $2 \times 10^5$  cells per ml in 6-well plates and transfected with specific siRNA against NEAT1 with Lipofectamine 3000 (Thermo Fisher Scientific, USA) according to the manufacturer’s instructions. Then cells were trypsinized and seeded into 24-well Seahorse XF24 culture plates with 10% fetal bovine serum RMPI-1640 and 100 nM rapamycin was added to the medium to inhibits mTOR activity. After indicated treatments , cells were incubated in base medium with 2 mM L-glutamine at 37 °C for 1 h and ECAR assay were performed in a CO2-free incubator to ensure accurate measurements of extracellular pH. After every 3 measurements in

8-min intervals, 10 mM glucose, 10  $\mu$ M oligomycin or 50 mM 2-deoxy-D-glucose (Sigma, USA) was added at the indicated time points into each well. Finally, glycolytic capacity was calculated as the difference between the ECAR following the injection of 1  $\mu$ M oligomycin and the basal ECAR reading. ECAR values are presented as the mean  $\pm$  s.d. of experimental triplicates.

### **LC-MS measurement of [U-<sup>13</sup>C]-glucose labeled metabolites**

For isotope tracing of glycolytic metabolites in HCC cells,  $0.5 \times 10^6$  SNU423 cells were plated and transfected with specific siRNA against NEAT1\_2 with Lipofectamine 3000 (Thermo Fisher Scientific, USA) based on the manufacturer's instructions. After treatment with 100 nM rapamycin for 16 h, the medium was changed to glucose-free DMEM containing 10% dialyzed serum and 25 mM [U-<sup>13</sup>C]-glucose and incubated for 15 min. Metabolites were extracted in ice-cold methanol:acetonitrile:water (40:40:20) with 0.5% formic acid and then neutralized with 15% NH<sub>4</sub>HCO<sub>3</sub>. The metabolite extracts were analyzed using a Q Exactive PLUS Hybrid Quadrupole-Orbitrap Mass Spectrometer (Thermo Fisher Scientific) coupled to hydrophilic interaction chromatography (HILIC). The mass spectrometer was under a negative ionization mode. Glycolytic metabolite features were extracted in MAVEN with a 5 ppm-mass accuracy window. The <sup>13</sup>C isotope abundance and impurity of labeled substrate were corrected and normalized using AccuCor written in R.

### **Pathway enrichment analysis of CCLE metabolomic dataset of HCC cells**

Metabolomics and NEAT1 mRNA expression datasets of HCC cell lines were obtained from the CCLE portal (<https://portals.broadinstitute.org/ccle>). 22 metabolites that negatively correlated with NEAT1 expression were uploaded in metaboanalyst (<http://www.metaboanalyst.ca/MetaboAnalyst/>). Metabolite Set Enrichment Analysis (MSEA) was subsequently carried out using Metaboanalyst (<http://www.metaboanalyst.ca/MetaboAnalyst/>) and the KEGG (<http://www.genome.jp/kegg/pathway.html>) pathway database. Metabolic pathways negatively correlated with NEAT1 expression was generated. The overrepresentation analysis (ORA) tool was used to determine

whether a particular pathway was significant. Only metabolite sets with statistically significant ( $p < 0.05$ ) subsystems were shown.

### **NONO motif analysis**

The consensus NONO RNA-binding motif M307\_0.6 (AGGGA) from the Database of RNA-binding protein specificities (RBPDB) was utilized for the motif scanning analysis. NONO motif loci analysis was carried out using Find Individual Motif occurrences (FIMO, v5.3.3) to identify statistically overrepresented motifs using default parameters. The motifs identified in the input RNA molecules that correlated with NEAT1 expression in TCGA hepatocellular carcinoma (LIHC) transcriptome dataset are sorted based on the one-sided Fisher's Test p-value ( $p < 0.0001$ ) and details of these candidate regions are listed in the Table S2.

### **References**

1. Vichai V, Kirtikara K. Sulforhodamine B colorimetric assay for cytotoxicity screening. *Nat Protoc.* 2006; 1: 1112-6.
2. Kim D, Langmead B, Salzberg SL. HISAT: a fast spliced aligner with low memory requirements. *Nat Methods.* 2015; 12: 357-60.
3. Pertea M, Pertea GM, Antonescu CM, Chang TC, Mendell JT, Salzberg SL. StringTie enables improved reconstruction of a transcriptome from RNA-seq reads. *Nat Biotechnol.* 2015; 33: 290-5.
4. Nasim MT, Eperon IC. A double-reporter splicing assay for determining splicing efficiency in mammalian cells. *Nat Protoc.* 2006; 1: 1022-8.
5. Goldman MJ, Craft B, Hastie M, Repecka K, McDade F, Kamath A, et al. Visualizing and interpreting cancer genomics data via the Xena platform. *Nat Biotechnol.* 2020; 38: 675-8.
